# Supplementary material
Source: PubMed Central journal article supplement (PMC4326751)
Supplement: supp_pp.114.253369_253369Supplemental_Data.pdf [file supp_pp.114.253369_253369Supplemental_Data.pdf]

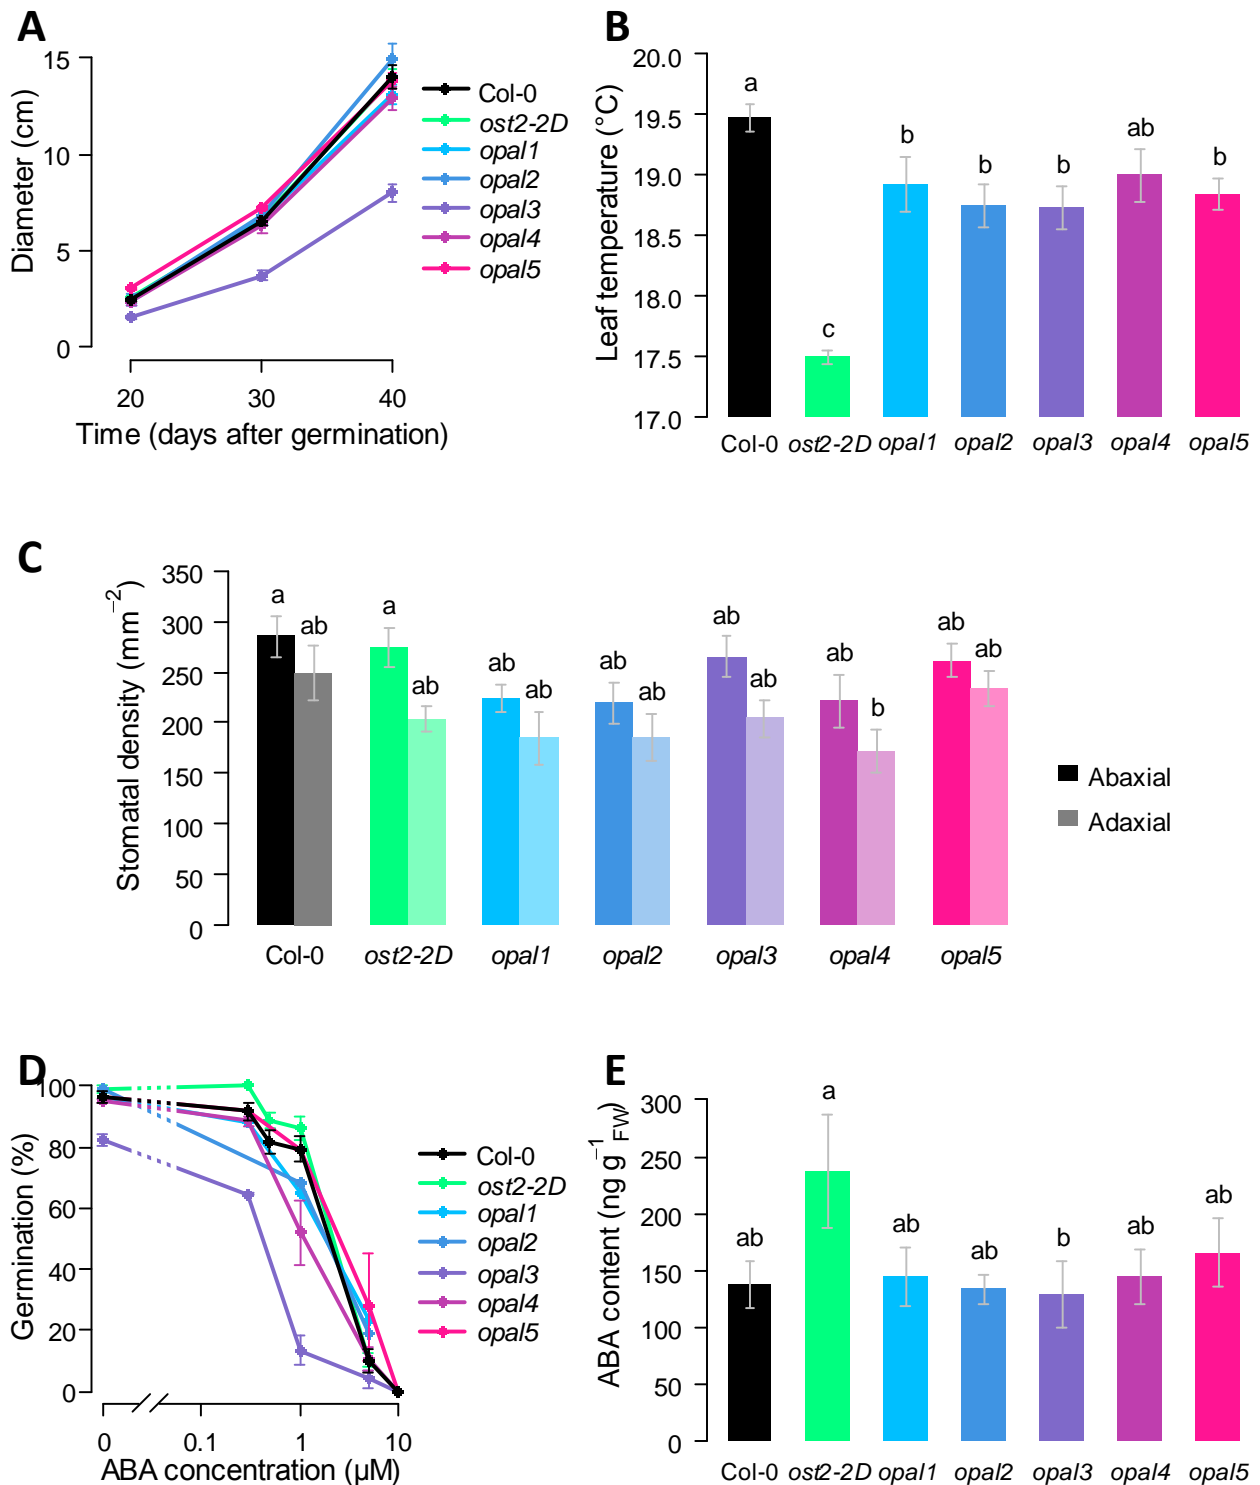

**Supplemental Figure S1.** Further phenotypic characterization of the *opal* mutants. A, Time-course of rosette diameter (n = 6). B, Leaf temperature estimated from infrared images as the average of 14 spots per plant (n = 5) selected randomly at the surface of fully expanded leaves. C, Stomatal density. For each genotype, dark and light color stands for the abaxial and the adaxial side, respectively (n = 6). D, Effect of ABA concentration on seed germination (11 ≤ n ≤ 2). E, ABA content of fresh rosettes (n = 5). Error bars are means ± SE. Letters denote significant differences after a Tukey (C) or Kruskal-Wallis (B, D) test (α = 0.05).

**Table S1. Isolation and characterization of mutants with low temperature in darkness**

| Isolation number <sup>a</sup>                                            | Rosette size <sup>b</sup> | Rosette colour <sup>c</sup> | Other phenotypes                                                                              | Genetics <sup>d</sup>             | Mutant name                 |
|--------------------------------------------------------------------------|---------------------------|-----------------------------|-----------------------------------------------------------------------------------------------|-----------------------------------|-----------------------------|
| <u>'Normal' growth</u>                                                   |                           |                             |                                                                                               |                                   |                             |
| I-3                                                                      | ++++                      | +++                         |                                                                                               | Recessive<br>( $\chi^2 = 1.210$ ) | <i>opal1</i>                |
| I-5                                                                      | ++++                      | +++                         |                                                                                               | Recessive<br>( $\chi^2 = 0.006$ ) | <i>opal2</i>                |
| II-9                                                                     | +++                       | +++                         | Necrotic spots at mature size                                                                 | Recessive<br>( $\chi^2 = 3.226$ ) | <i>opal3</i>                |
| II-16                                                                    | ++++                      | +++                         | Necrotic spots at mature size                                                                 | Dominant                          | <i>ost2-2D</i> <sup>e</sup> |
| III-23                                                                   | ++++                      | +++                         |                                                                                               | Recessive<br>( $\chi^2 = 0.163$ ) | <i>opal4</i>                |
| III-27                                                                   | ++++                      | ++                          |                                                                                               | Recessive<br>( $\chi^2 = 0.856$ ) | <i>opal5</i>                |
| <u>'Impaired' growth</u>                                                 |                           |                             |                                                                                               |                                   |                             |
| I-4, III-22                                                              | ++                        | +++                         | Curled thick leaves                                                                           |                                   |                             |
| III-32, III-33, V-60, V-66                                               | ++                        | ++                          | Asymmetric rosette (III-33), necrotic tips at mature size (III-33,V-66), narrow leaves (V-60) |                                   |                             |
| III-30, IV-40, V-54, V-64                                                | ++                        | +                           | Triangular-shaped leaves (IV-40)                                                              |                                   |                             |
| I-8, III-21, III-29, VI-80                                               | +                         | +++                         | Curled thick leaves                                                                           |                                   |                             |
| I-1, II-10, IV-48, V-58, VI-78, VI-81                                    | +                         | ++                          | Narrow leaves (II-10, IV-48)                                                                  |                                   |                             |
| I-2, II-11, II-12, II-13, II-17, II-18, III-20, III-25, V-59, V-61, V-67 | +                         | +                           |                                                                                               |                                   |                             |

<sup>a</sup> Each Roman numeral stands for a screen experiment

<sup>b</sup> Rosette size was scored 2-3 weeks after germination: ++++ is similar to the wild-type, +++ is slightly reduced, ++ is severely reduced and + is dramatically reduced

<sup>c</sup> Rosette colour was scored 2-3 weeks after germination: +++ is similar to the wild-type, ++ is pale green and + is chlorotic

<sup>d</sup> Segregation analysis was based on seedlings temperature measured 15-30 days after germination by infra-red imaging. Chi-square values were calculated on the basis of an expected ratio of 3:1 (wild-type : cool) in the F<sub>2</sub> generation with the hypothesis that the mutation is a single recessive nuclear mutation ( $\chi^2_{\text{critic}} = 3.841$ , df = 1, P = 0.05)

<sup>e</sup> Merlot et al., 2007, EMBO J 26: 3216–3226
